# Supplementary material
Source: PubMed Central journal article supplement (PMC7098792)
Supplement: jciinsight-5-134270-s030.pdf [file jciinsight-5-134270-s030.pdf]

## Supplemental Material

### Circadian rhythm phase shifts caused by timed exercise vary with chronotype

J. Matthew Thomas, Philip A. Kern, Heather M. Bush, Kristen J. McQuerry, W. Scott Black, Jody L. Clasey, Julie S. Pendergast

**Table S1. Baseline characteristics of study participants by sex and exercise group**

| Variable <sup>A</sup>                                         | Morning Exercise |               | Evening Exercise |               |
|---------------------------------------------------------------|------------------|---------------|------------------|---------------|
|                                                               | Male (N=8)       | Female (N=18) | Male (N=8)       | Female (N=18) |
| Age                                                           | 21.88 ± 1.49     | 26.06 ± 1.52  | 23.63 ± 1.70     | 23.78 ± 1.19  |
| Body Mass (kg)                                                | 73.99 ± 3.65     | 63.53 ± 3.57  | 73.10 ± 3.81     | 67.31 ± 2.79  |
| Height (cm)                                                   | 171.69 ± 2.11    | 163.32 ± 1.22 | 175.54 ± 1.88    | 164.74 ± 1.95 |
| BMI (kg/m <sup>2</sup> )                                      | 25.05 ± 0.93     | 23.71 ± 1.17  | 23.70 ± 1.06     | 24.94 ± 1.14  |
| <b>Sleep and Circadian Measures</b>                           |                  |               |                  |               |
| Circadian Phase Shift (h)                                     | 0.46 ± 0.42      | 0.53 ± 0.25   | 0.25 ± 0.29      | 0.02 ± 0.21   |
| Baseline DLMO (hh:mm)                                         | 22:20 ± 00:27    | 21:38 ± 00:20 | 22:33 ± 00:39    | 22:35 ± 00:19 |
| MEQ Baseline Score                                            | 52.38 ± 2.78     | 50.89 ± 2.32  | 50.75 ± 2.38     | 45.22 ± 2.40  |
| Mid-Sleep Exercise Days (hh:mm)*                              | 3:43 ± 00:23     | 3:14 ± 00:16  | 4:38 ± 00:20     | 4:58 ± 00:17  |
| Sleep Fragmentation Index (%)*                                | 27.80 ± 1.91     | 23.58 ± 1.41  | 25.96 ± 3.47     | 26.82 ± 2.16  |
| <b>Anthropometric and Body Composition</b>                    |                  |               |                  |               |
| Waist Circumference (cm)                                      | 80.76 ± 1.63     | 72.92 ± 2.35  | 80.33 ± 3.02     | 76.37 ± 2.55  |
| Abdominal Circumference (cm)                                  | 85.26 ± 1.50     | 81.51 ± 2.96  | 85.63 ± 3.86     | 85.52 ± 2.70  |
| Hip Circumference (cm)                                        | 99.79 ± 2.52     | 99.63 ± 2.47  | 99.30 ± 2.64     | 101.79 ± 2.20 |
| Body Fat Percentage (%)                                       | 27.88 ± 1.63     | 32.54 ± 2.19  | 24.90 ± 3.10     | 35.81 ± 1.74  |
| Fat Mass (kg)                                                 | 20.12 ± 1.86     | 21.37 ± 2.62  | 18.30 ± 3.01     | 24.05 ± 2.05  |
| Fat Free Mass (kg)                                            | 51.41 ± 1.83     | 41.52 ± 1.59  | 52.61 ± 1.86     | 41.36 ± 1.16  |
| Mineral-free Lean Mass (kg)                                   | 48.84 ± 1.78     | 39.21 ± 1.51  | 50.02 ± 1.75     | 39.08 ± 1.09  |
| <b>Cardiorespiratory Fitness</b>                              |                  |               |                  |               |
| VO <sub>2peak</sub> (mL*kg <sup>-1</sup> *min <sup>-1</sup> ) | 46.38 ± 2.1      | 35.59 ± 1.47  | 44.30 ± 2.83     | 33.25 ± 1.55  |
| <b>Environmental Conditions</b>                               |                  |               |                  |               |
| Civil Daylength (h)                                           | 13.13 ± 0.70     | 12.81 ± 0.30  | 12.51 ± 0.39     | 12.91 ± 0.38  |

<sup>A</sup>Data are Means ± SEM

\*N is reduced by 7 total participants.

**Table S2. Characteristics of study participants by sex**

| Variable <sup>A</sup>                                         | Male (N=16)   | Female (N=36) | p-value <sup>B</sup> |
|---------------------------------------------------------------|---------------|---------------|----------------------|
| Age                                                           | 22.75 ± 1.12  | 24.92 ± 0.97  | 0.19                 |
| Body Mass (kg)                                                | 73.54 ± 2.55  | 65.42 ± 2.26  | 0.04                 |
| Height (cm)                                                   | 173.61 ± 1.45 | 164.03 ± 1.14 | <0.01                |
| BMI (kg/m <sup>2</sup> )                                      | 24.37 ± 0.70  | 24.32 ± 0.81  | 0.97                 |
| <b>Sleep and Circadian Measures</b>                           |               |               |                      |
| Circadian Phase Shift (h)                                     | 0.36 ± 0.25   | 0.27 ± 0.17   | 0.79                 |
| Baseline DLMO (hh:mm)                                         | 22:26 ± 00:23 | 22:06 ± 00:14 | 0.45                 |
| Post-exercise DLMO (hh:mm)                                    | 22:05 ± 00:18 | 21:50 ± 00:15 | 0.57                 |
| MEQ Baseline Score                                            | 51.56 ± 1.78  | 48.06 ± 1.71  | 0.22                 |
| Mid-Sleep Exercise Days (hh:mm)*                              | 4:15 ± 00:17  | 4:01 ± 00:15  | 0.60                 |
| Sleep Fragmentation Index (%)*                                | 26.73 ± 2.11  | 25.05 ± 1.26  | 0.50                 |
| <b>Anthropometric and Body Composition</b>                    |               |               |                      |
| Waist Circumference (cm)                                      | 80.54 ± 1.66  | 74.65 ± 1.73  | 0.04                 |
| Abdominal Circumference (cm)                                  | 85.44 ± 2.00  | 83.51 ± 2.01  | 0.56                 |
| Hip Circumference (cm)                                        | 99.54 ± 1.77  | 100.71 ± 1.64 | 0.67                 |
| Body Fat Percentage (%)                                       | 26.39 ± 1.74  | 34.18 ± 1.41  | <0.01                |
| Fat Mass (kg)                                                 | 19.21 ± 1.73  | 22.71 ± 1.65  | 0.21                 |
| Fat Free Mass (kg)                                            | 52.01 ± 1.27  | 41.44 ± 0.97  | <0.01                |
| Mineral-free Lean Mass (kg)                                   | 49.43 ± 1.21  | 39.14 ± 0.92  | <0.01                |
| <b>Cardiorespiratory Fitness</b>                              |               |               |                      |
| VO <sub>2Peak</sub> (mL*kg <sup>-1</sup> *min <sup>-1</sup> ) | 45.41 ± 1.70  | 34.45 ± 1.07  | <0.01                |
| <b>Environmental Conditions</b>                               |               |               |                      |
| Civil Daylength (h)                                           | 12.82 ± 0.40  | 12.86 ± 0.24  | 0.93                 |

<sup>A</sup>Data are Means ± SEM. <sup>B</sup>Participant characteristics for the males and females were compared using independent sample *t*-tests

\*N is reduced by 7 total participants.

**Table S3. Characteristics of participants that withdrew from the study****Randomized to Morning Exercise Group**

| Subject ID | Sex    | Reason                                                                        | MEQ Score | MEQ Category*         |
|------------|--------|-------------------------------------------------------------------------------|-----------|-----------------------|
| 23         | Female | Unforeseen schedule conflict                                                  | 63        | Moderate morning type |
| 31         | Female | Schedule conflict/transportation                                              | 47        | Neither type          |
| 36         | Female | Unwilling to forgo beginning a personal training regime                       | 73        | Definite morning type |
| 45         | Female | Unwilling to complete DLMO                                                    | 57        | Neither type          |
| 52         | Female | Separate commitment that required exercise training outside of study protocol | 56        | Neither type          |
| 72         | Female | Time constraints                                                              | 50        | Neither type          |

**Randomized to Evening Exercise Group**

|    |        |                                                                         |    |                       |
|----|--------|-------------------------------------------------------------------------|----|-----------------------|
| 16 | Male   | Academic/personal issues                                                | 55 | Neither type          |
| 24 | Female | Unwilling to refrain from additional exercise outside of study protocol | 44 | Neither type          |
| 30 | Male   | Family event/emergency                                                  | 45 | Neither type          |
| 44 | Female | Personal issues                                                         | 40 | Moderate evening type |
| 57 | Female | Unforeseen schedule conflict                                            | 61 | Moderate morning type |

\*The categories for the Morningness-Eveningness Questionnaire (MEQ) were from (1)

**Table S4. Estimated Phase Shift Difference for Evening vs. Morning Exercise Group**

|         |                                                   | Mean Phase Shift Difference | Standard Error | p-value |
|---------|---------------------------------------------------|-----------------------------|----------------|---------|
| Model 1 | (Unadjusted)                                      | -0.42                       | 0.27           | 0.13    |
| Model 2 | Adjusted for baseline DLMO                        | -0.64                       | 0.25           | 0.01    |
| Model 3 | Adjusted for baseline MEQ score                   | -0.49                       | 0.28           | 0.08    |
| Model 4 | Adjusted for baseline DLMO and baseline MEQ score | -0.62                       | 0.26           | 0.02    |
| Model 5 | Adjusted for midsleep on exercise days            | -0.53                       | 0.36           | 0.15    |
| Model 6 | Adjusted for sex                                  | -0.42                       | 0.28           | 0.13    |

**Table S5. Effect of earlier and later chronotypes on estimated phase shift difference\***

| Baseline DLMO group | Exercise Group | Mean  | Standard Error | Mean Phase Shift Difference | <i>p</i> -value |
|---------------------|----------------|-------|----------------|-----------------------------|-----------------|
| Earlier Chronotypes | Morning        | 0.49  | 0.25           | -0.90                       | 0.02            |
|                     | Evening        | -0.41 | 0.29           |                             |                 |
| Later Chronotypes   | Morning        | 0.54  | 0.29           | -0.08                       | 0.83            |
|                     | Evening        | 0.46  | 0.25           |                             |                 |

\*Results adjusted for baseline DLMO

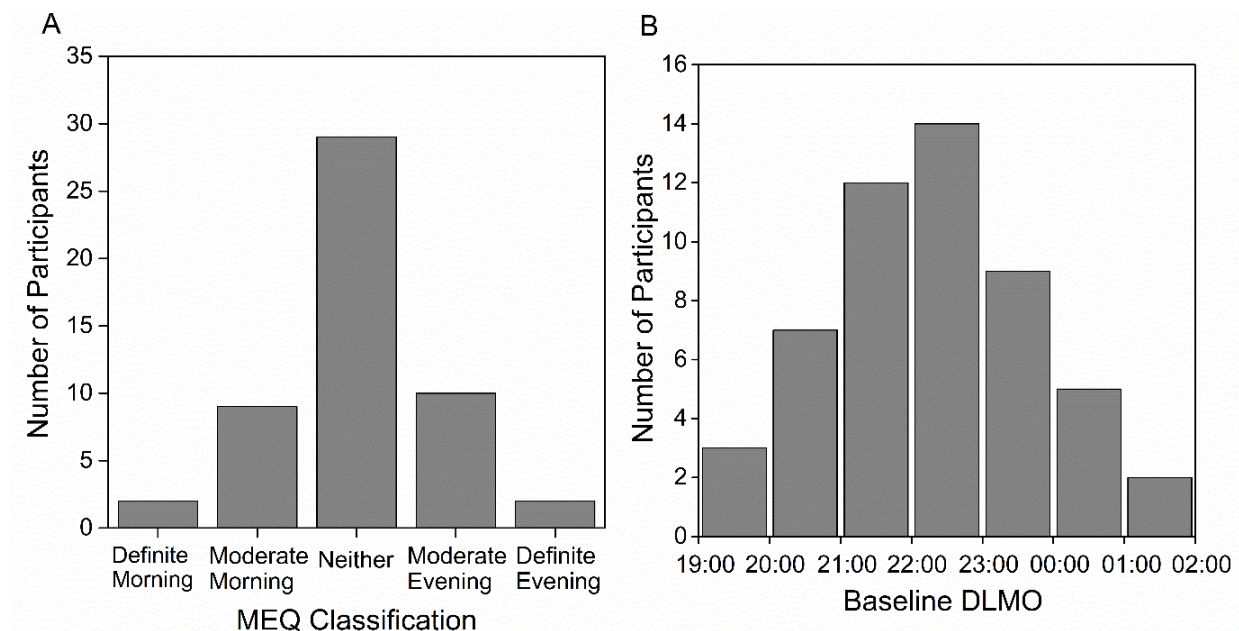

**Supplemental Figure S1. Chronotype was normally distributed among our study participants.** Young sedentary adults completed a MEQ questionnaire at the consent session (A) and the DLMO assay 1-9 days later (B) to objectively assess circadian phase at baseline (prior to the exercise intervention).

#### Supplemental Reference

1. Horne JA, and Ostberg O. A self-assessment questionnaire to determine morningness-eveningness in human circadian rhythms. *Int J Chronobiol.* 1976;4(2):97-110.
